# Supplementary material for: Combined molecular docking, homology modelling and density functional theory studies to modify dioxygenase to efficiently degrade aromatic hydrocarbons
Source: Royal Society of Chemistry journal article supplement (doi:10.1039/c8ra10663k), 2019-01-01
Supplement: c8ra10663k1.pdf [file c8ra10663k1.pdf]

## Combined molecular docking, homology modelling and density functional theory studies to modify dioxygenase to efficiently degrade aromatic hydrocarbons

Xingchun Li,<sup>†a</sup> Zhenhua Chu,<sup>†b</sup> Xianyuan Du,<sup>a</sup> Youli Qiu<sup>b</sup> and Yu Li,<sup>\*b</sup>

<sup>a</sup> State Key Laboratory of Petroleum Pollution Control, Beijing 102206, China.

<sup>b</sup> College of Environmental Science and Engineering, North China Electric Power University, Beijing 102206,

China. E-mail: liyuxx8@hotmail.com

<sup>†</sup>These authors contributed equally to this work.

Table A.1 Hydrophilic/hydrophobic characteristics of 20 amino acids<sup>1</sup>

| Amino acids   | Abbrevia-<br>tion | Hydrophilic/<br>hydrophobic | Hydrophobic<br>value | Amino<br>acids | Abbrevia-<br>tion | Hydrophilic/<br>hydrophobic | Hydrophobic<br>value |
|---------------|-------------------|-----------------------------|----------------------|----------------|-------------------|-----------------------------|----------------------|
| Alanine       | Ala               | Hydrophobic                 | 0.62                 | Methionine     | Met               | Hydrophobic                 | 0.64                 |
| Cysteine      | Cys               | Hydrophilic                 | 0.29                 | Asparagine     | Asn               | Hydrophilic                 | -0.85                |
| Aspartic acid | Asp               | Hydrophilic                 | -1.05                | Proline        | Pro               | Hydrophobic                 | 0.12                 |
| Glutamic acid | Glu               | Hydrophilic                 | -0.87                | Glutamine      | Gln               | Hydrophilic                 | -0.78                |
| Phenylalanine | Phe               | Hydrophobic                 | 1.19                 | Arginine       | Arg               | Hydrophilic                 | -1.73                |
| Glycine       | Gly               | Undetermined                | 0.48                 | Serine         | Ser               | Hydrophilic                 | -0.18                |
| Histidine     | His               | Hydrophilic                 | -0.40                | Threonine      | Thr               | Hydrophilic                 | -0.05                |
| Isoleucine    | Ile               | Hydrophobic                 | 1.38                 | Valine         | Val               | Hydrophobic                 | 1.08                 |
| Lysine        | Lys               | Hydrophilic                 | -1.35                | Tryptophan     | Trp               | Hydrophobic                 | 0.81                 |
| Leucine       | Leu               | Hydrophobic                 | 1.06                 | Tyrosine       | Tyr               | Hydrophobic                 | 0.26                 |

<sup>1</sup> : Cited from Reference (V. Fauchere-Pliska, *Eur. J. Med. Chem.*, 1983, **18**, 369-375).
